# Supplementary material for: A two-stage microbial association mapping framework with advanced FDR control
Source: PubMed Central journal article supplement (PMC6060480; doi:10.1186/s40168-018-0517-1), 2018-07-25

*Ruminococcaceae|Other*

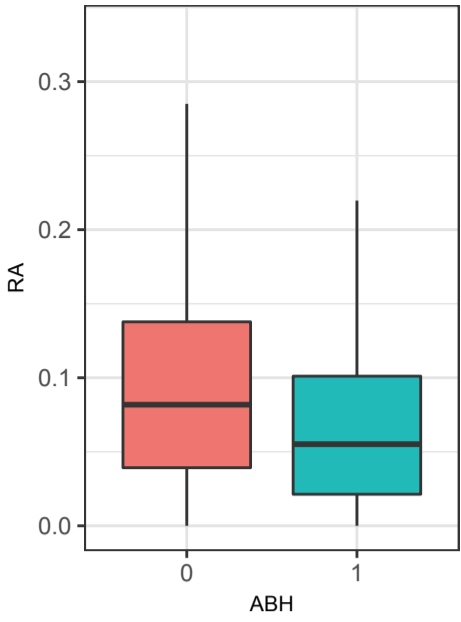

*[Ruminococcus] gnavus*

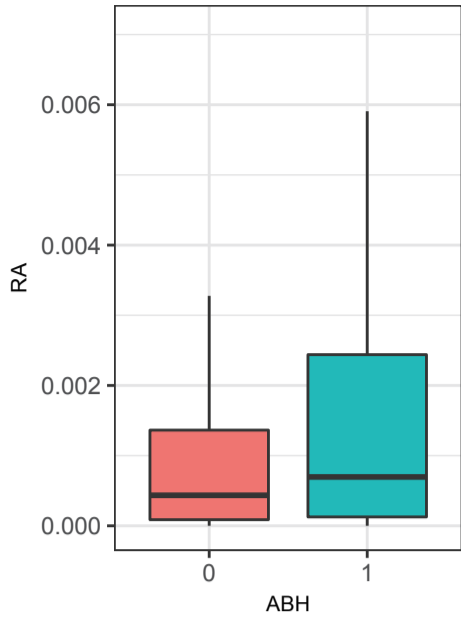

*Proteus|Other*

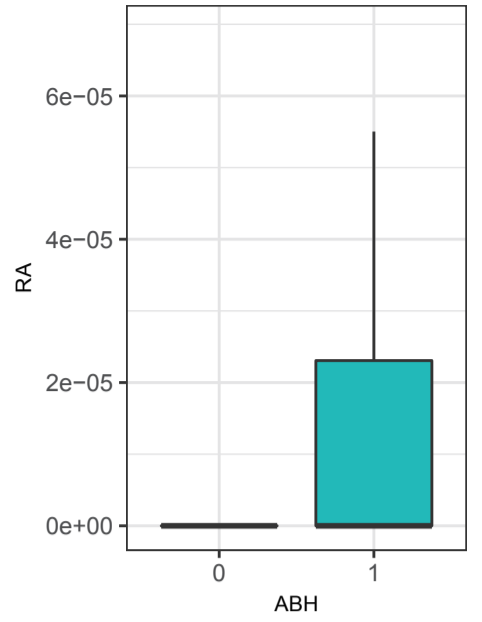

*Odoribacter|Other*

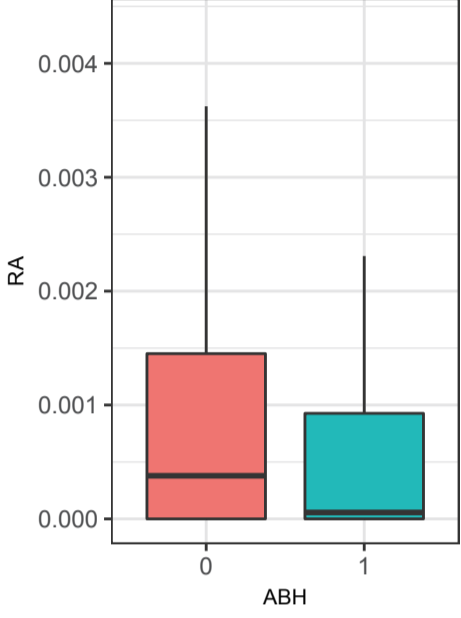

*Rothia mucilaginosa*

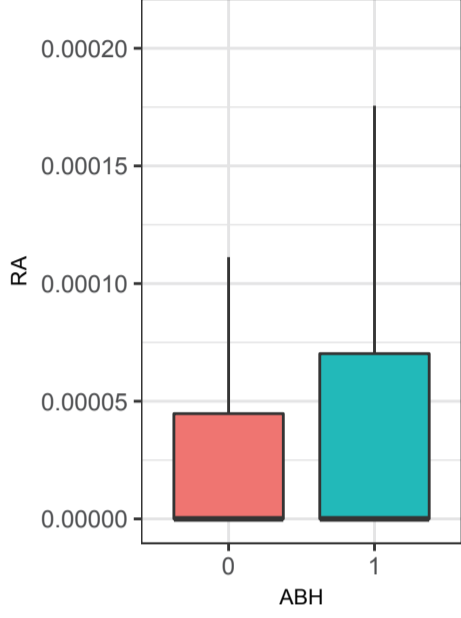

*Christensenellaceae|Other*

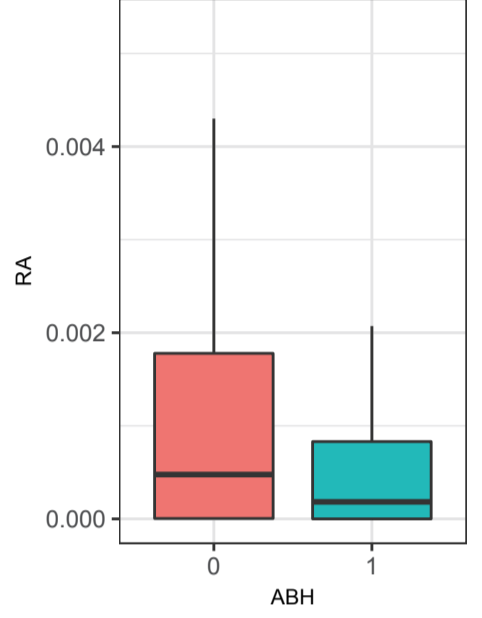

*Streptococcus|Other*

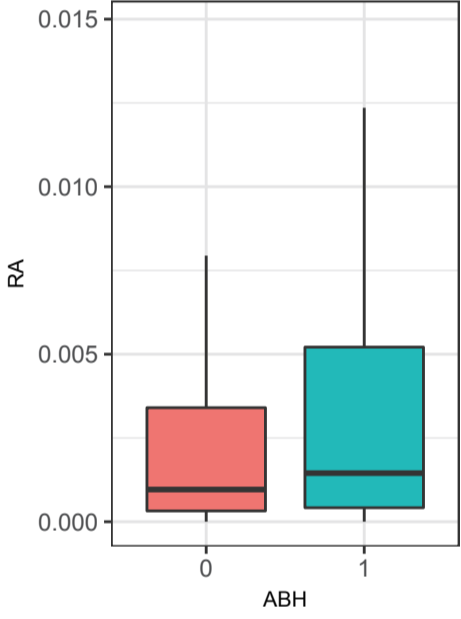

*Actinomyces|Other*

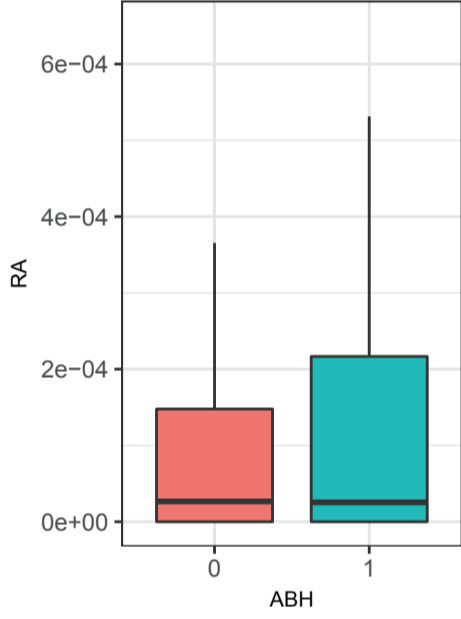

*Anaerostipes|Other*

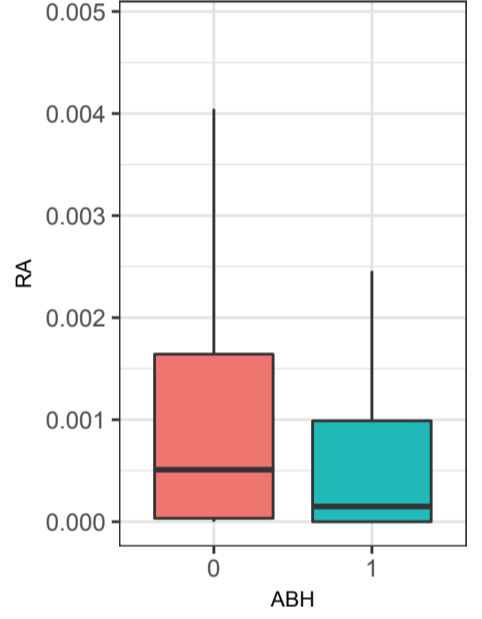

*[Eubacterium] dolichum*

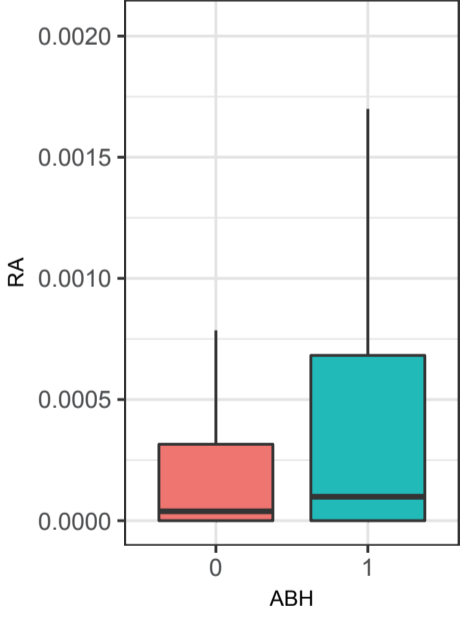

*Rothia dentocariosa*

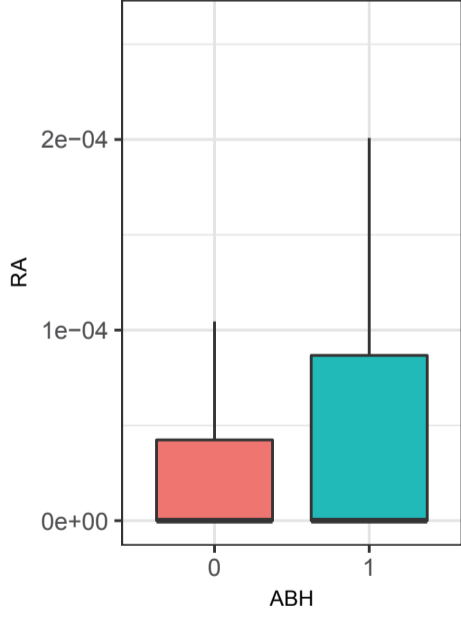

*Coprococcus|Other*

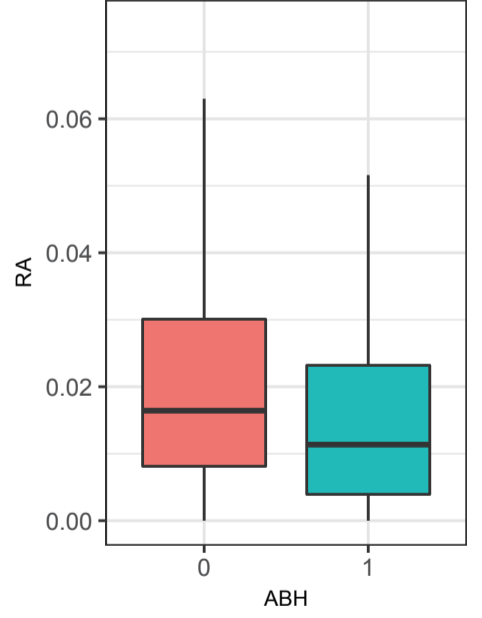

*Granulicatella|Other*

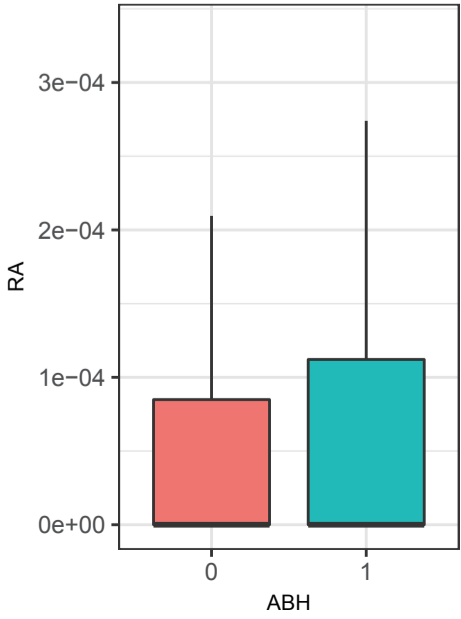

*Haemophilus parainfluenzae*

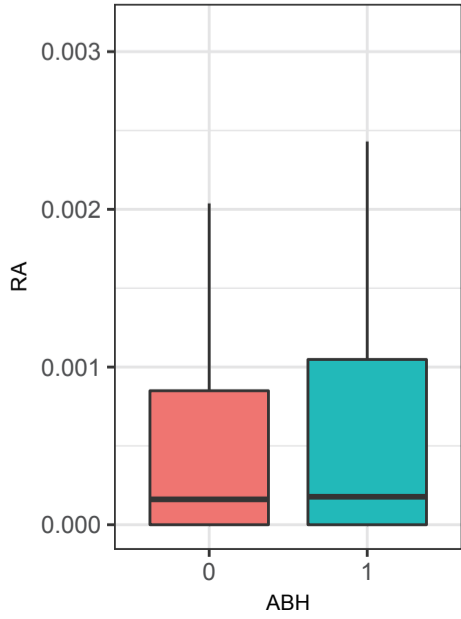

*Dorea formicigenerans*

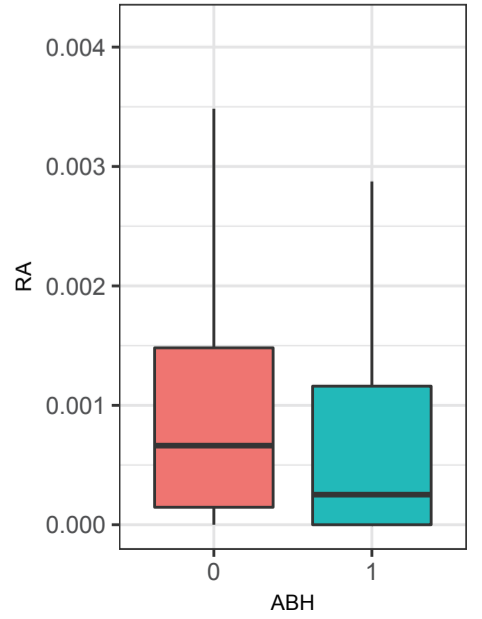

Supplement: 40168_2018_517_MOESM7_ESM.pdf [file 40168_2018_517_MOESM7_ESM.pdf]
