# Supplementary material for: A two-stage microbial association mapping framework with advanced FDR control
Source: PubMed Central journal article supplement (PMC6060480; doi:10.1186/s40168-018-0517-1), 2018-07-25
Supplement: 40168_2018_517_MOESM1_ESM.pdf [file 40168_2018_517_MOESM1_ESM.pdf]

(A)

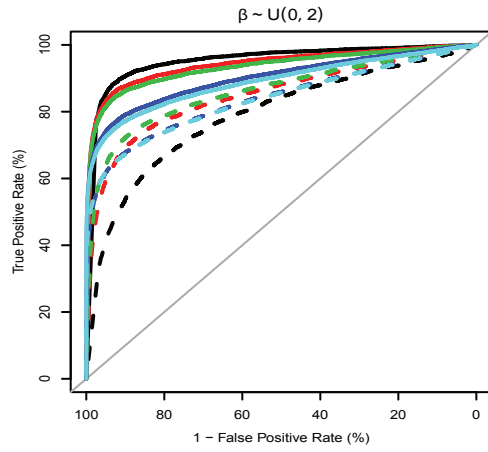

| AUC (%) | Phylum | Class | Order | Family | Genus |
|---------|--------|-------|-------|--------|-------|
| OMIAT   | 95.11  | 94.08 | 93.27 | 90.02  | 88.95 |
| AGG     | 78.90  | 84.86 | 86.13 | 83.76  | 83.64 |

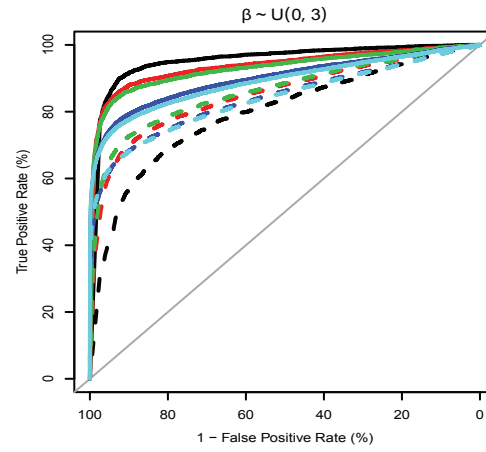

| AUC (%) | Phylum | Class | Order | Family | Genus |
|---------|--------|-------|-------|--------|-------|
| OMIAT   | 95.26  | 93.57 | 92.88 | 89.85  | 89.01 |
| AGG     | 79.48  | 85.01 | 86.02 | 84.00  | 83.75 |

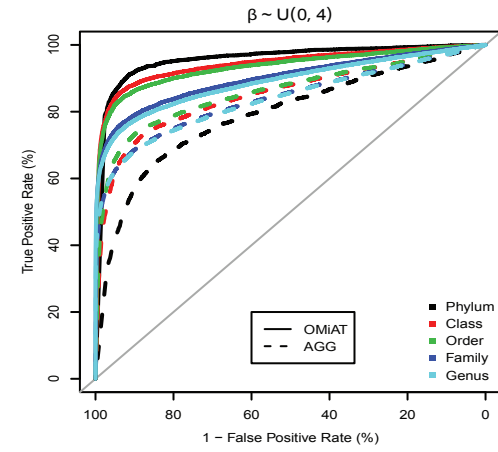

| AUC (%) | Phylum | Class | Order | Family | Genus |
|---------|--------|-------|-------|--------|-------|
| OMIAT   | 95.57  | 94.15 | 93.29 | 89.89  | 88.96 |
| AGG     | 79.08  | 85.05 | 85.93 | 83.90  | 83.72 |

(B)

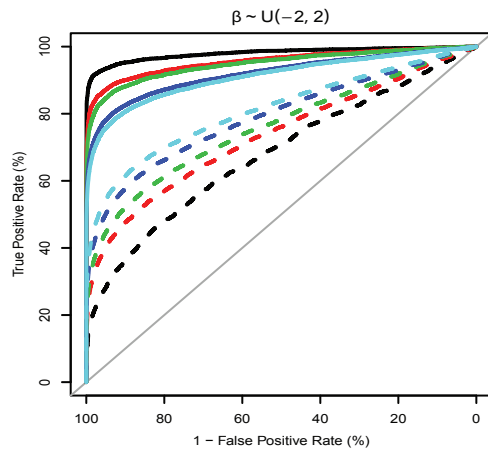

| AUC (%) | Phylum | Class | Order | Family | Genus |
|---------|--------|-------|-------|--------|-------|
| OMIAT   | 97.94  | 95.58 | 94.81 | 91.89  | 91.05 |
| AGG     | 67.95  | 73.42 | 75.94 | 79.08  | 81.13 |

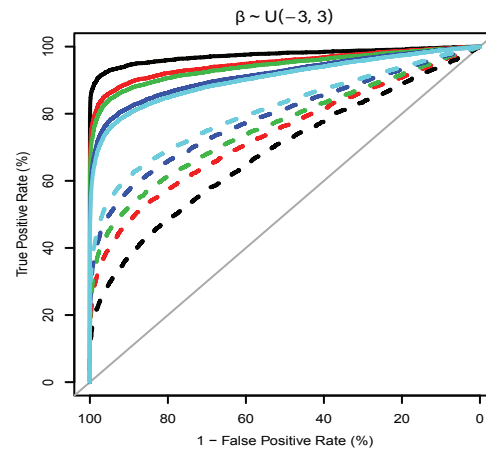

| AUC (%) | Phylum | Class | Order | Family | Genus |
|---------|--------|-------|-------|--------|-------|
| OMIAT   | 97.40  | 94.89 | 94.00 | 91.46  | 90.53 |
| AGG     | 68.43  | 73.70 | 76.02 | 78.87  | 80.91 |

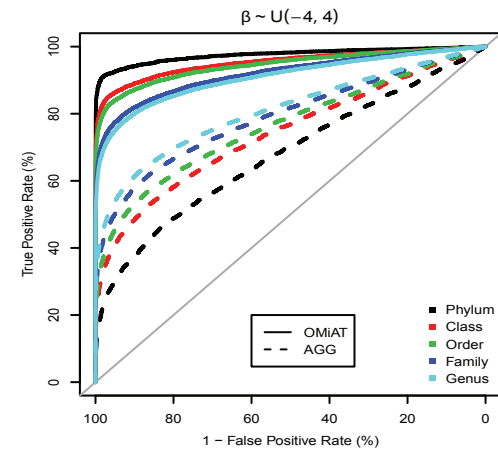

| AUC (%) | Phylum | Class | Order | Family | Genus |
|---------|--------|-------|-------|--------|-------|
| OMIAT   | 97.48  | 95.17 | 94.39 | 91.85  | 90.89 |
| AGG     | 67.86  | 74.14 | 76.38 | 79.10  | 80.90 |
