# Supplementary material for: A two-stage microbial association mapping framework with advanced FDR control
Source: PubMed Central journal article supplement (PMC6060480; doi:10.1186/s40168-018-0517-1), 2018-07-25
Supplement: 40168_2018_517_MOESM6_ESM.pdf [file 40168_2018_517_MOESM6_ESM.pdf]

| Family                      | Size <sup>1</sup> | OMiAT       |                  | Aggregate Method |                  |
|-----------------------------|-------------------|-------------|------------------|------------------|------------------|
|                             |                   | Raw p-value | Adjusted p-value | Raw p-value      | Adjusted p-value |
| <i>Ruminococcaceae</i>      | 5                 | 5.0E-06     | 1.0E-02          | 2.1E-04          |                  |
| <i>Erysipelotrichaceae</i>  | 4                 | 1.0E-04     | 3.5E-01          | 3.1E-03          |                  |
| <i>Micrococcaceae</i>       | 2                 | 4.0E-04     | 1.0E-04          | 5.5E-03          | 5.9E-03          |
| <i>Lachnospiraceae</i>      | 12                | 1.0E-03     | 3.4E-01          | 9.8E-03          |                  |
| <i>Christensenellaceae</i>  | 1                 | 1.2E-03     | 1.2E-03          | 1.0E-02          | 2.5E-02          |
| <i>Porphyromonadaceae</i>   | 3                 | 1.6E-03     | 5.1E-01          | 1.1E-02          |                  |
| <i>Streptococcaceae</i>     | 1                 | 3.5E-03     | 3.5E-03          | 1.4E-02          | 3.5E-02          |
| <i>Actinomycetaceae</i>     | 1                 | 3.4E-03     | 3.4E-03          | 1.4E-02          | 3.5E-02          |
| [ <i>Odoribacteraceae</i> ] | 2                 | 3.2E-03     | 4.4E-02          | 1.4E-02          |                  |
| <i>Enterobacteriaceae</i>   | 4                 | 3.2E-03     | 3.7E-01          | 1.4E-02          |                  |
| <i>Carnobacteriaceae</i>    | 1                 | 8.1E-03     | 8.1E-03          | 2.8E-02          |                  |
| <i>Pasteurellaceae</i>      | 1                 | 8.1E-03     | 8.1E-03          | 2.8E-02          |                  |

<sup>1</sup>The number of species within the corresponding taxonomic group.
