# Supplementary material for: A two-stage microbial association mapping framework with advanced FDR control
Source: PubMed Central journal article supplement (PMC6060480; doi:10.1186/s40168-018-0517-1), 2018-07-25
Supplement: 40168_2018_517_MOESM8_ESM.pdf [file 40168_2018_517_MOESM8_ESM.pdf]

| Family                     | Size <sup>1</sup> | OMiAT       |                  |
|----------------------------|-------------------|-------------|------------------|
|                            |                   | Raw p-value | Adjusted p-value |
| <i>Bifidobacteriaceae</i>  | 2                 | 4.9E-05     | 2.0E-03          |
| <i>Clostridiaceae</i>      | 2                 | 1.3E-03     | 2.7E-02          |
| <i>Erysipelotrichaceae</i> | 4                 | 2.9E-03     | 4.0E-02          |
| <i>Prevotellaceae</i>      | 4                 | 5.0E-03     | 5.2E-02          |
| <i>[Barnesiellaceae]</i>   | 1                 | 1.1E-02     | 8.7E-02          |

<sup>1</sup>The number of species within the corresponding taxonomic group.
