# Supplementary material for: A two-stage microbial association mapping framework with advanced FDR control
Source: PubMed Central journal article supplement (PMC6060480; doi:10.1186/s40168-018-0517-1), 2018-07-25

*[Eubacterium] biforme*

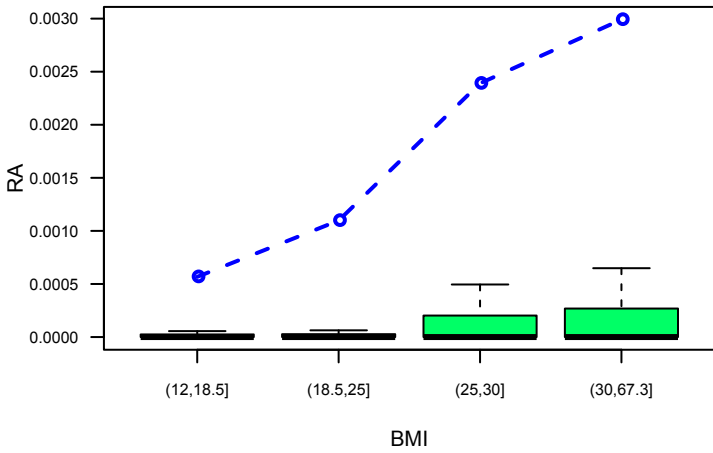

*Bifidobacterium|Other*

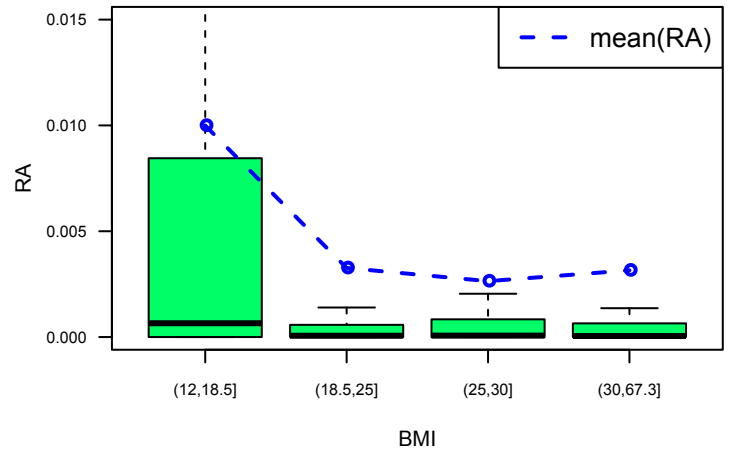

*Clostridiaceae|Other*

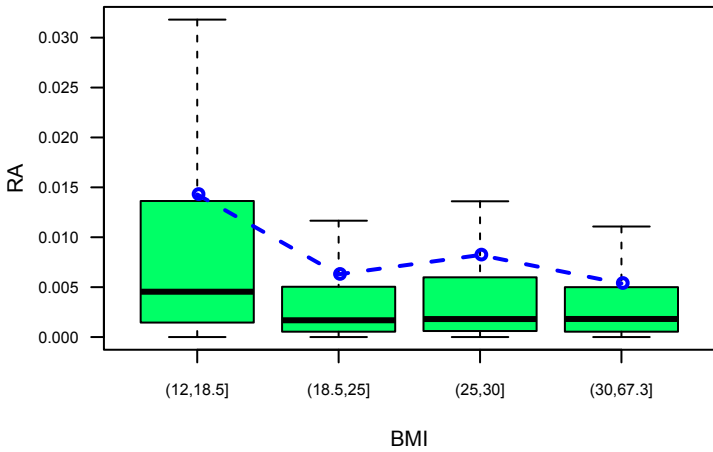

*[Barnesiellaceae]|Other*

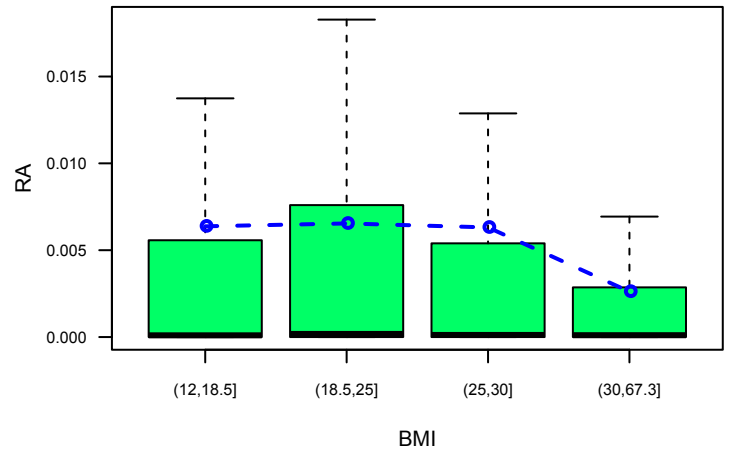

*Catenibacterium|Other*

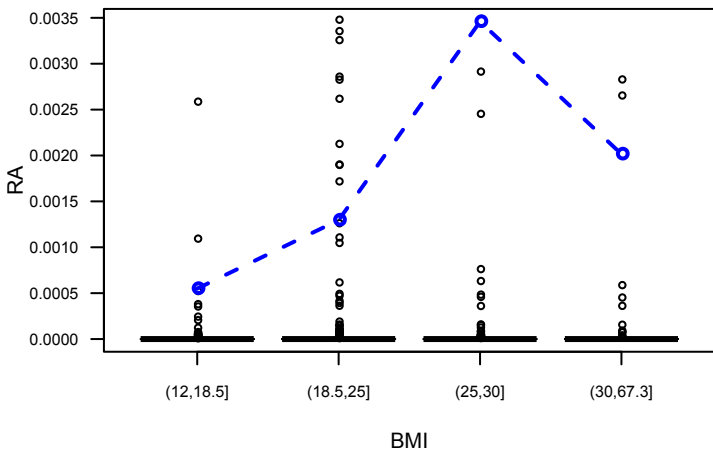

*Prevotella stercorea*

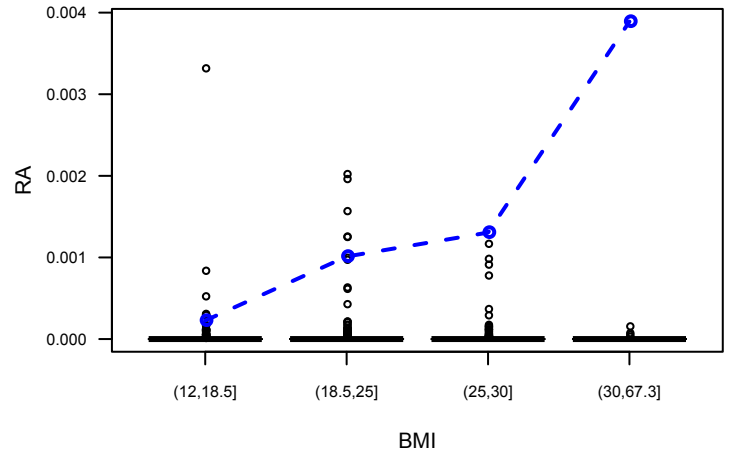

Supplement: 40168_2018_517_MOESM9_ESM.pdf [file 40168_2018_517_MOESM9_ESM.pdf]
