# Supplementary material for: A two-stage microbial association mapping framework with advanced FDR control
Source: PubMed Central journal article supplement (PMC6060480; doi:10.1186/s40168-018-0517-1), 2018-07-25
Supplement: 40168_2018_517_MOESM10_ESM.pdf [file 40168_2018_517_MOESM10_ESM.pdf]

| OTU ID                                           | Species                       | Raw p-value | BH       | OMiAT-HBH | OMiAT-SST | AGG-HBH  | AGG-SST  |
|--------------------------------------------------|-------------------------------|-------------|----------|-----------|-----------|----------|----------|
| 297635                                           | <i>[Eubacterium] biforme</i>  | 1.90E-04    | 1.70E-02 | 1.50E-03  | 7.60E-04  |          |          |
| 824876                                           | <i>Bifidobacterium/ Other</i> | 2.70E-03    |          | 1.10E-02  | 5.30E-03  |          |          |
| 4319938                                          | <i>Clostridiaceae/ Other</i>  | 1.00E-02    |          | 2.70E-02  | 2.00E-02  |          |          |
| <b>Number of detected BMI-associated species</b> |                               |             | <b>1</b> | <b>3</b>  | <b>3</b>  | <b>0</b> | <b>0</b> |
