# Supplementary material for: A two-stage microbial association mapping framework with advanced FDR control
Source: PubMed Central journal article supplement (PMC6060480; doi:10.1186/s40168-018-0517-1), 2018-07-25
Supplement: 40168_2018_517_MOESM11_ESM.pdf [file 40168_2018_517_MOESM11_ESM.pdf]

| Family                   | Size <sup>1</sup> | OMiAT       |                  | Aggregate Method |                  |
|--------------------------|-------------------|-------------|------------------|------------------|------------------|
|                          |                   | Raw p-value | Adjusted p-value | Raw p-value      | Adjusted p-value |
| <i>Lactobacillaceae</i>  | 4                 | 5.00E-06    | 9.00E-05         | 2.36E-02         |                  |
| <i>Ruminococcaceae</i>   | 6                 | 4.00E-04    | 2.30E-03         | 2.00E-04         | 2.50E-03         |
| <i>Coriobacteriaceae</i> | 1                 | 3.00E-04    | 2.30E-03         | 3.00E-04         | 2.50E-03         |
| <i>Lachnospiraceae</i>   | 7                 | 3.40E-03    | 1.51E-02         | 9.50E-03         |                  |

<sup>1</sup>The number of species within the corresponding taxonomic group.
